# Supplementary material
Source: PubMed Central journal article supplement (PMC7588402)
Supplement: bjsports-2018-100355supp001.pdf [file bjsports-2018-100355supp001.pdf]

**Supplementary Table 1** Questions on compliance to the 2011 adult MVPA recommendation in national surveys since 2008.

| Country          | Survey                                | Year |      |      |      |      |      |      |      |      |      | Description of alternative method 'B'                                                                                                                                                                                                                                                                                                        |
|------------------|---------------------------------------|------|------|------|------|------|------|------|------|------|------|----------------------------------------------------------------------------------------------------------------------------------------------------------------------------------------------------------------------------------------------------------------------------------------------------------------------------------------------|
|                  |                                       | 2017 | 2016 | 2015 | 2014 | 2013 | 2012 | 2011 | 2010 | 2009 | 2008 |                                                                                                                                                                                                                                                                                                                                              |
| England          | Active Lives Survey[1]                | A    | A    | B    | B    | B    | B    | X    | X    | X    | X    | Pre-2015, it was the Active People Survey. Telephone administered and different questionnaire. Pre-2012, the questions only asked about sport participation. A variation on the IPAQ short included on years when main questionnaire is not. Note: Accelerometry piloted in a sub-sample in 2008.                                            |
|                  | Health Survey for England[2]          | B    | A    | B    | B    | B    | A    | X    | X    | X    | A    |                                                                                                                                                                                                                                                                                                                                              |
| Northern Ireland | Health Survey for Northern Ireland[3] | ?    | A    | B    | X    | A    | A    | B    | B    |      |      | In 2015, IPAQ short was used. In 2010/11, a 7-day recall questionnaire was used.                                                                                                                                                                                                                                                             |
| Scotland         | Scottish Health Survey[4]             | A    | A    | A    | A    | A    | A    | A    | A    | A    | A    | Minor changes made in 2012 but trends can be calculated back to 2008.                                                                                                                                                                                                                                                                        |
| Wales            | Welsh Health Survey[5]                |      |      | A    | X    | X    | X    | X    | X    | X    | X    | The Welsh Health Survey was merged into the National Survey for Wales in 2016. In 2015, the Welsh Health Survey asked half the sample the questions now included in the National Survey for Wales. Prior to that, the Welsh Health Survey measured MVPA but not in a way that enabled compliance to the 2011 recommendation to be estimated. |
|                  | National Survey for Wales[6]          | A    | A    |      |      |      |      |      |      |      |      |                                                                                                                                                                                                                                                                                                                                              |

MVPA: moderate-to-vigorous physical activity; IPAQ: International Physical Activity Questionnaire. A: Used a comparable method (with tolerance to minor questionnaire changes) to those described in Table 2. B: Used an alternative method to measure compliance to the 2011 adult MVPA recommendation (descriptions included in table). X: No measure of meeting the 2011 adult MVPA recommendation included in the survey. Blank: Survey not run. ? indicates documentation not yet published.

### Supplementary Table 1 references

- 1 Sport England, TNS BMRB. Active People Survey 5-7 Technical Report 2013. Available from: [https://www.sportengland.org/media/3388/active-people-survey-6\\_technical-report\\_final.pdf](https://www.sportengland.org/media/3388/active-people-survey-6_technical-report_final.pdf).
- 2 UK Data Service. Health Survey for England 2018. Available from: [beta.ukdataservice.ac.uk/datacatalogue/series/series?id=2000021](https://beta.ukdataservice.ac.uk/datacatalogue/series/series?id=2000021) Archived at: <http://www.webcitation.org/72e444sR1>.
- 3 Department of Health. Health Survey Northern Ireland questionnaires. 2016. <https://www.health-ni.gov.uk/publications/health-survey-northern-ireland-questionnaires> Archived at: <http://www.webcitation.org/7315vtYHR>
- 4 Scottish Government. Scottish Health Survey: Reports and publications 2018. Available from: <https://www.gov.scot/Topics/Statistics/Browse/Health/scottish-health-survey/Publications> Archived at: <http://www.webcitation.org/72e56q8aS>.
- 5 Welsh Government. Welsh Health Survey: Past releases 2016. Available from: <https://gov.wales/statistics-and-research/welsh-health-survey/?tab=previous&lang=en> Archived at: .
- 6 Welsh Government. National Survey for Wales Design and Methodology 2018. Available from: <http://gov.wales/statistics-and-research/national-survey/design-methodology/?lang=en> Archived at: <http://www.webcitation.org/72NnN7RpJ>.
