# Supplementary material
Source: PubMed Central journal article supplement (PMC7588402)
Supplement: bjsports-2018-100355supp003.pdf [file bjsports-2018-100355supp003.pdf]

**Supplementary Table 3** Self-report questions used in U.K. national surveys to report SB in adults and children described in terms of the TASST framework[1]**The TAXonomy of Self-reported Sedentary behaviour Tools (TASST)**

| Domain name      | Type of Assessment                                                                                                                         | Recall Period                               | Temporal Unit | Assessment Period                                                                |
|------------------|--------------------------------------------------------------------------------------------------------------------------------------------|---------------------------------------------|---------------|----------------------------------------------------------------------------------|
| A <sup>1</sup>   | 1.2.2.1 Sum of Behaviours: work; TV; other (not work, not TV).                                                                             | 2.3 longer (previous 4 weeks)               | 3.1 day       | 4.3 both week and weekend days. <i>NOTE: work asked for work (not week) days</i> |
| B <sup>2,3</sup> | 1.2.2.1 Sum of Behaviours: work; TV; other (not work, not TV). <i>NOTE for work, asked about sitting and standing in the same question</i> | 2.3 longer (previous 4 weeks)               | 3.1 day       | 4.3 both week and weekend days. <i>NOTE: work asked for work (not week) days</i> |
| C <sup>1</sup>   | 1.2.2.1 Sum of Behaviours: TV; other (not school, not TV).                                                                                 | 2.4 unanchored (asks about an average week) | 3.1 day       | 4.3 both week and weekend days.                                                  |
| D <sup>2</sup>   | 1.2.2.1 Sum of Behaviours: TV; other (not school, not TV).                                                                                 | 2.2 previous week                           | 3.1 day       | 4.3 both week and weekend days.                                                  |
| E <sup>2,3</sup> | 1.1.1 Single item direct measure (i.e. total time spent sitting)                                                                           | 2.2 previous week                           | 3.1 day       | 4.3 both week and weekend days.                                                  |
| F <sup>4</sup>   | 1.1.1 Single item direct measure (i.e. total time spent sitting)                                                                           | 2.2 previous week                           | 3.1 day       | 4.1 week days only.                                                              |
| G <sup>1</sup>   | 1.1.2 Single item proxy measure (TV)                                                                                                       | 2.3 longer (previous 4 weeks)               | 3.1 day       | 4.1 week day only                                                                |

Question used in: <sup>1</sup> the Scottish Health Survey; <sup>2</sup> the Health Survey for England; <sup>3</sup> the Health Survey for Northern Ireland; <sup>4</sup> Welsh Health Survey.

**Reference for Supplementary Table 3**

1 Dall PM, Coulter EH, Fitzsimons CF, et al. TAXonomy of Self-reported Sedentary behaviour Tools (TASST) framework for development, comparison and evaluation of self-report tools: content analysis and systematic review. *BMJ Open*. 2017;7:e013844-e. doi: 10.1136/bmjopen-2016-013844
