# Supplementary material
Source: PubMed Central journal article supplement (PMC7588402)
Supplement: bjsports-2018-100355supp004.pdf [file bjsports-2018-100355supp004.pdf]

Supplementary Figure 1. Example of single direct item of sitting asked as a visual analogue scale, for a previous week recall period (reproduced from [1])

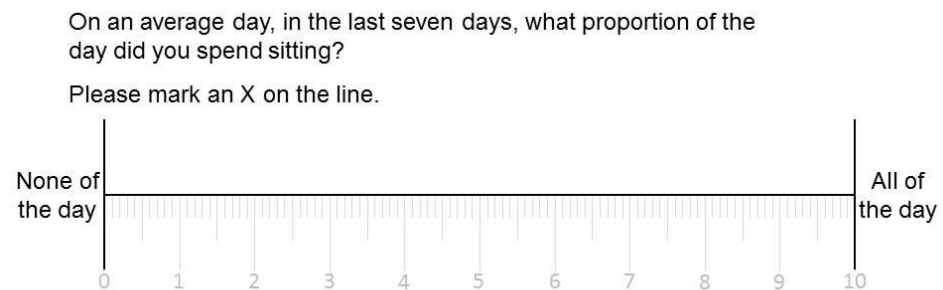

#### Reference for Supplementary Figure 1

1 Chastin SFM, Dontje ML, Skelton DA, et al. Systematic comparative validation of self-report measures of sedentary time against an objective measure of postural sitting (activPAL). *IJBNPA*. 2018;15:21. doi: 10.1186/s12966-018-0652-x
